# Supplementary material
Source: PubMed Central journal article supplement (PMC3081033)
Supplement: 1018214108_pnas.201018214SI.pdf [file 1018214108_pnas.201018214SI.pdf]

# Supporting Information

de Quervain et al. 10.1073/pnas.1018214108

**Table S1. Salivary cortisol concentrations in nmol/L**

| Saliva probe                                                  | Placebo group | Cortisol group | Significance, <i>P</i> |
|---------------------------------------------------------------|---------------|----------------|------------------------|
| Pretreatment assessment, baseline                             | 10.8 (2.3)    | 10.7 (1.7)     | 0.962                  |
| Treatment session 1, baseline                                 | 10.0 (2.0)    | 9.7 (1.1)      | 0.919                  |
| Treatment session 1, 1 h after medication, before VR exposure | 12.2 (5.6)    | 265.2 (61.3)   | 0.001                  |
| Treatment session 1, after VR exposure                        | 10.4 (3.3)    | 114.8 (16.9)   | 0.000                  |
| Treatment session 2, baseline                                 | 7.8 (0.9)     | 8.1 (1.1)      | 0.823                  |
| Treatment session 2, 1 h after medication, before VR exposure | 7.1 (1.5)     | 164.7 (38.8)   | 0.001                  |
| Treatment session 2, after VR exposure                        | 7.6 (2.5)     | 113.4 (34.7)   | 0.007                  |
| Treatment session 3, baseline                                 | 8.3 (1.5)     | 9.6 (1.3)      | 0.524                  |
| Treatment session 3, 1 h after medication, before VR exposure | 5.6 (0.7)     | 169.6 (39.5)   | 0.001                  |
| Treatment session 3, after VR exposure                        | 6.4 (0.9)     | 106.5 (19.2)   | 0.000                  |
| Posttreatment assessment, baseline                            | 8.1 (1.2)     | 8.6 (1.1)      | 0.756                  |
| Follow-up, baseline                                           | 10.1 (2.0)    | 7.8 (1.1)      | 0.332                  |

Data presented as mean (SEM). VR, virtual reality.

**Table S2. Demographic and clinical characteristics and baseline measurements at pretreatment assessment for the subsample (*n* = 25) used for skin conductance level (SCL) posttreatment analyses**

|                            | Placebo group | Cortisol group | Significance, <i>P</i> |
|----------------------------|---------------|----------------|------------------------|
| Females/males              | 4/7           | 6/8            | 0.742                  |
| Age                        | 40.7 (3.4)    | 44.1 (3.2)     | 0.482                  |
| BMI                        | 28.1 (1.7)    | 25.3 (1.1)     | 0.170                  |
| Severity primary diagnosis | 5.8 (0.3)     | 5.5 (0.3)      | 0.439                  |
| BDI total score            | 6.5 (1.6)     | 3.8 (1.3)      | 0.199                  |
| ASI total score            | 21.0 (2.5)    | 16.5 (2.0)     | 0.168                  |
| STAI trait total score     | 42.0 (2.4)    | 36.2 (1.9)     | 0.066                  |
| ITQ                        | 5.7 (1.4)     | 4.5 (1.7)      | 0.603                  |
| AQ                         | 57.5 (6.0)    | 55.0 (5.0)     | 0.754                  |
| ATHQ                       | 46.1 (2.8)    | 40.3 (2.3)     | 0.116                  |
| DES                        | 18.6 (1.2)    | 17.9 (1.2)     | 0.658                  |
| AES                        | 20.8 (2.0)    | 19.9 (1.8)     | 0.730                  |
| Treatment credibility      | 24.5 (0.7)    | 22.7 (0.8)     | 0.134                  |
| SUD                        | 49.4 (5.4)    | 54.6 (6.1)     | 0.560                  |
| BAT score                  | 4.5 (0.5)     | 4.4 (0.4)      | 0.970                  |

Data presented as mean (SEM). AES, anxiety expectancy scale; AQ, acrophobia questionnaire; ASI, anxiety sensitivity index; ATHQ, attitude toward heights questionnaire; BAT, behavioral avoidance test; BDI, Beck depression inventory; BMI, body mass index; DES, danger expectancy scale; ITQ, immersive tendencies questionnaire; STAI, state-trait anxiety inventory; SUD, subjective units of discomfort.

**Table S3. Demographic and clinical characteristics and baseline measurements at pretreatment assessment for the subsample ( $n = 20$ ) used for skin conductance level (SCL) follow-up analyses**

|                            | Placebo group | Cortisol group | Significance, <i>P</i> |
|----------------------------|---------------|----------------|------------------------|
| Females/males              | 3/6           | 4/7            | 0.888                  |
| Age                        | 41.3 (4.0)    | 45.1 (3.5)     | 0.490                  |
| BMI                        | 28.5 (2.1)    | 25.6 (1.4)     | 0.239                  |
| Severity primary diagnosis | 5.4 (0.4)     | 5.6 (0.3)      | 0.844                  |
| BDI total score            | 5.7 (1.8)     | 3.9 (1.6)      | 0.475                  |
| ASI total score            | 19.2 (2.8)    | 17.7 (2.4)     | 0.689                  |
| STAI trait total score     | 38.0 (2.2)    | 36.5 (2.4)     | 0.649                  |
| ITQ                        | 4.2 (1.3)     | 3.8 (1.9)      | 0.869                  |
| AQ                         | 54.1 (7.4)    | 51.7 (5.7)     | 0.798                  |
| ATHQ                       | 42.6 (4.6)    | 40.7 (2.8)     | 0.730                  |
| DES                        | 17.3 (1.5)    | 18.0 (1.4)     | 0.749                  |
| AES                        | 19.8 (2.6)    | 20.4 (2.3)     | 0.868                  |
| Treatment credibility      | 23.8 (1.1)    | 22.8 (0.9)     | 0.510                  |
| SUD                        | 50.0 (6.6)    | 56.0 (5.8)     | 0.510                  |
| BAT score                  | 4.8 (0.7)     | 4.6 (0.5)      | 0.777                  |

Data presented as mean (SEM). AES, anxiety expectancy scale; AQ, acrophobia questionnaire; ASI, anxiety sensitivity index; ATHQ, attitude toward heights questionnaire; BAT, behavioral avoidance test; BDI, Beck depression inventory; BMI, body mass index; DES, danger expectancy scale; ITQ, immersive tendencies questionnaire; STAI, state-trait anxiety inventory; SUD, subjective units of discomfort.

**Table S4. Skin conductance level measurements (in microsiemens) for the 60-s periods on the floor and the 60-s period on the roof after going up with the elevator during VR at posttreatment**

|                                                     | Placebo group | Cortisol group | Significance, <i>P</i> |
|-----------------------------------------------------|---------------|----------------|------------------------|
| SCL for the 60-s periods on the floor posttreatment | 5.196 (1.131) | 6.060 (0.971)  | 0.579                  |
| SCL for the 60-s period on the roof posttreatment   | 5.714 (1.156) | 6.241 (0.996)  | 0.740                  |

Data presented as mean (SEM). SCL, skin conductance level.

**Table S5. Skin conductance level measurements (in microsiemens) for the 60-s periods on the floor and the 60-s period on the roof after going up with the elevator during VR at follow-up**

|                                                 | Placebo group | Cortisol group | Significance, <i>P</i> |
|-------------------------------------------------|---------------|----------------|------------------------|
| SCL for the 60-s periods on the floor follow-up | 4.458 (1.034) | 6.419 (0.925)  | 0.185                  |
| SCL for the 60-s period on the roof follow-up   | 4.957 (1.015) | 6.387 (0.907)  | 0.321                  |

Data presented as mean (SEM). SCL, skin conductance level.
